# Supplementary figures and images for: A Novel Next-Generation Sequencing Approach to Detecting Microsatellite Instability and Pan-Tumor Characterization of 1000 Microsatellite Instability–High Cases in 67,000 Patient Samples
Source: PubMed Central journal article supplement — J Mol Diagn. 2019 Nov;21(6):1053–66. doi: 10.1016/j.jmoldx.2019.06.011 (PMC7807551; doi:10.1016/j.jmoldx.2019.06.011), 2019-11

A

CRC

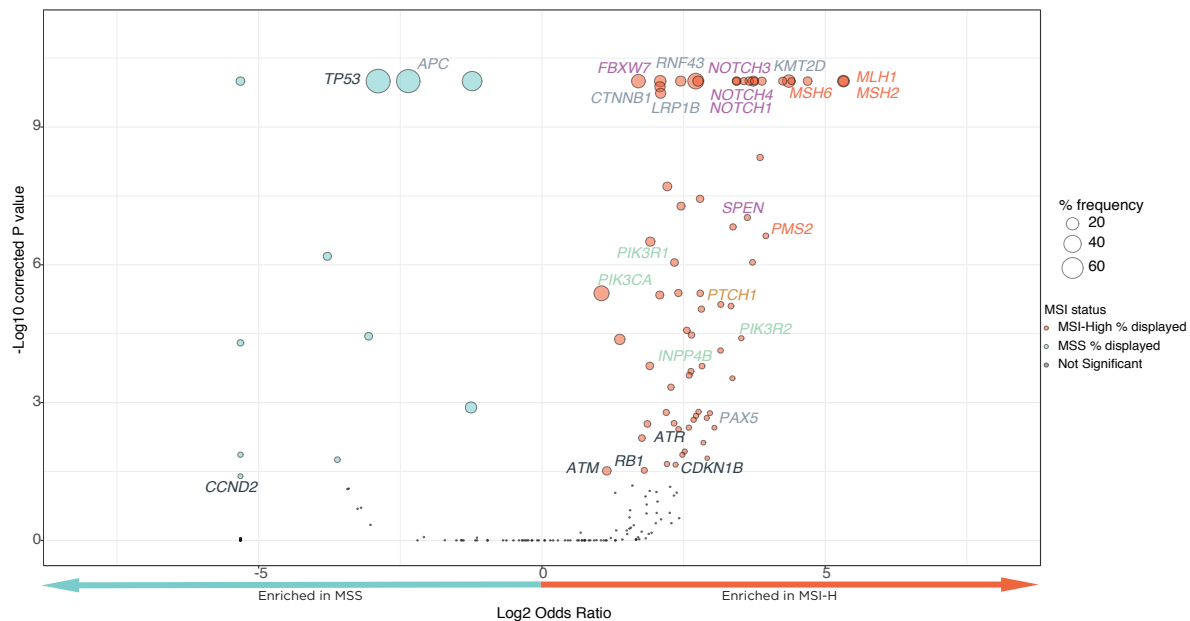

B

CUP

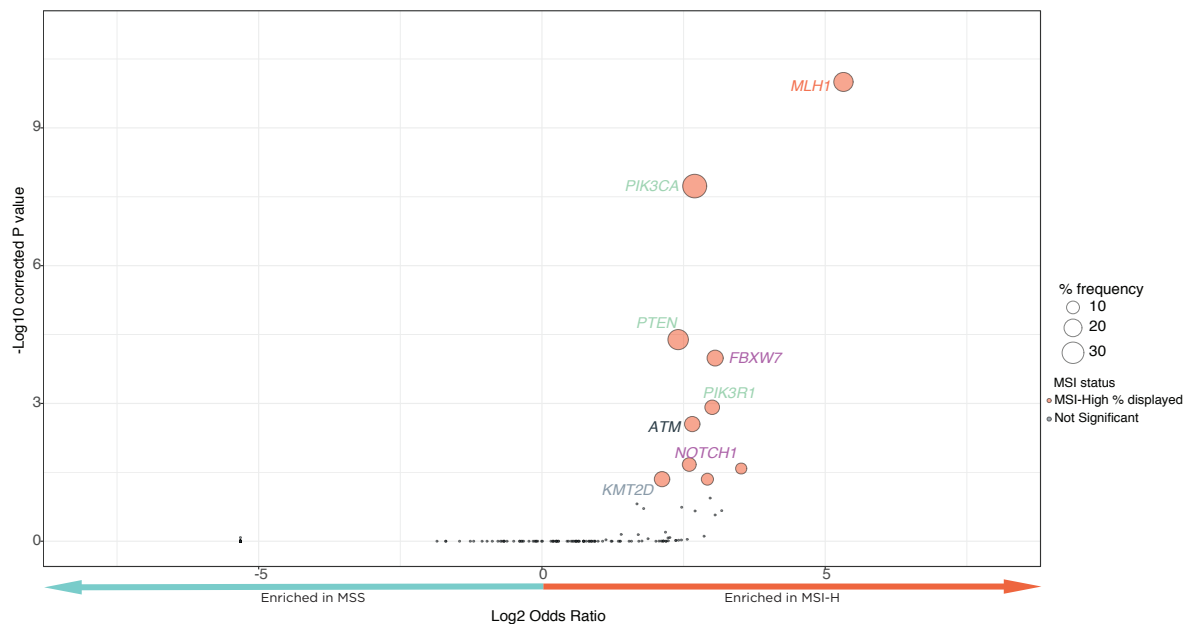

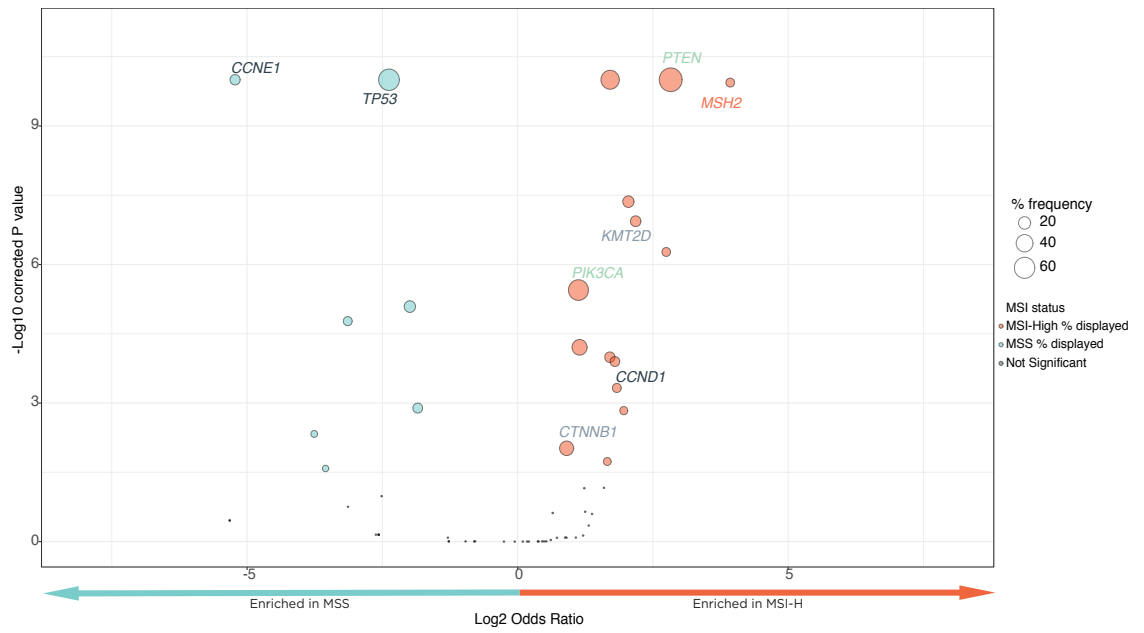

Ovary

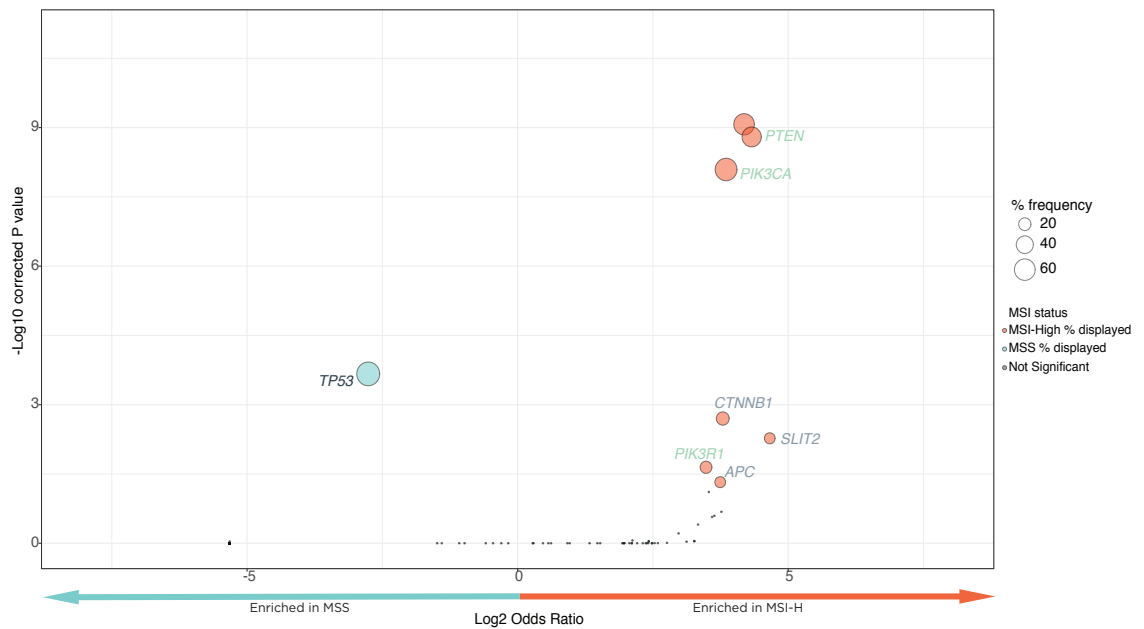

E

Gastric

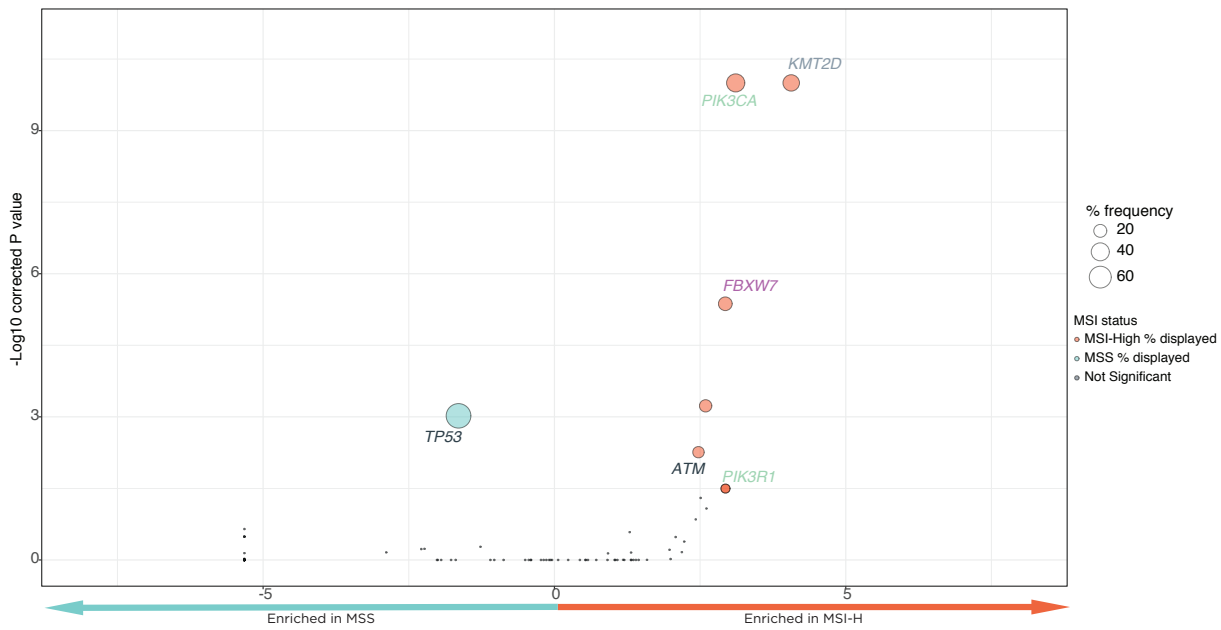

F

Lower-GI (non-CRC)

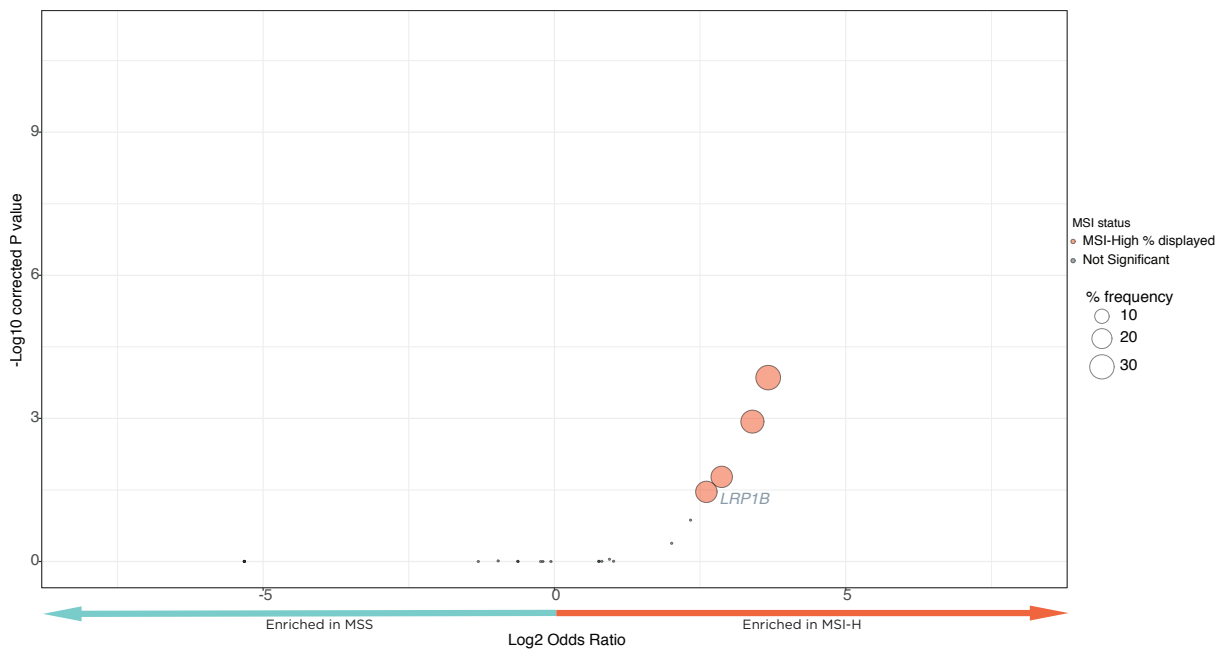

G

Lung

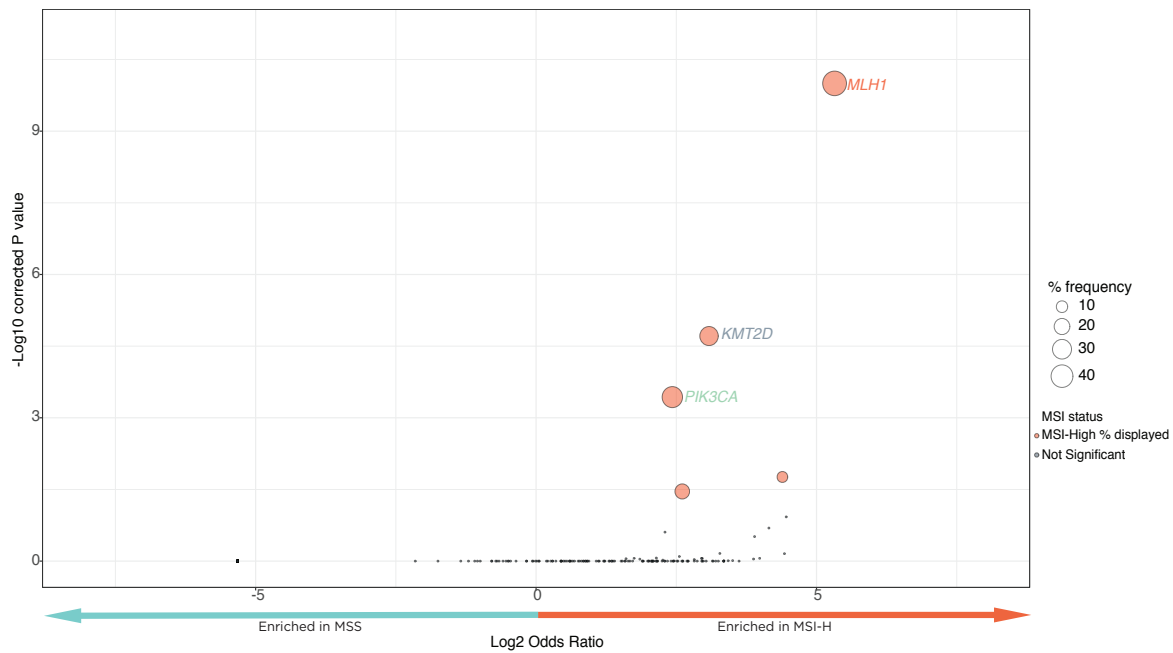

H

Prostate

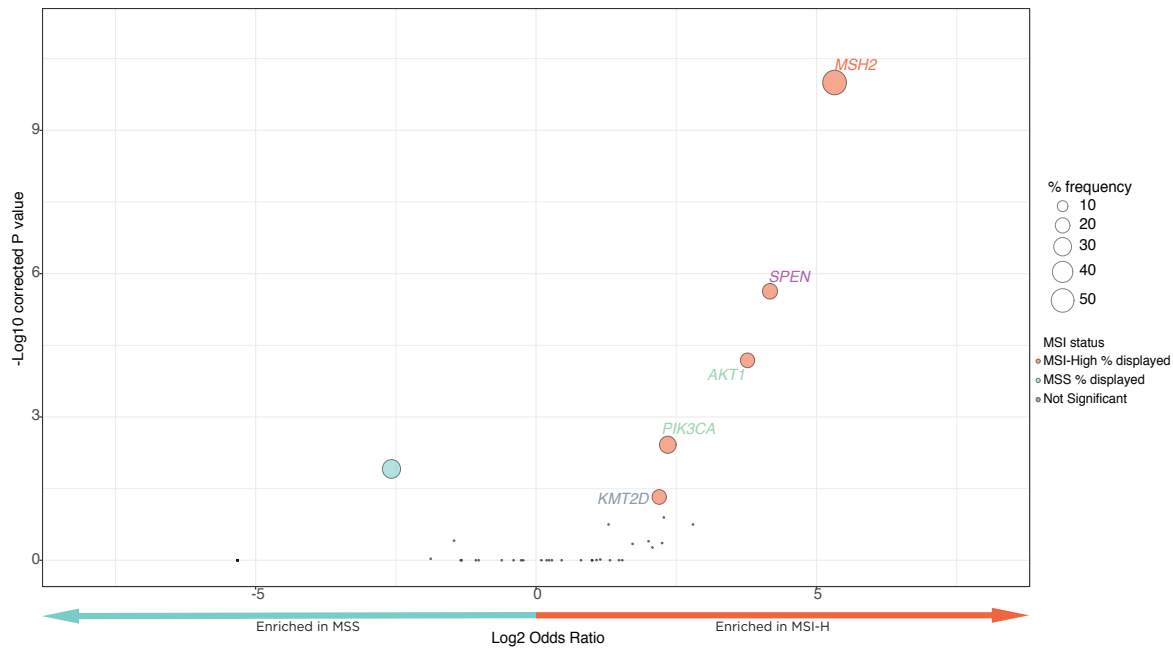

Supplement: mmc1.pdf [file mmc1.pdf]

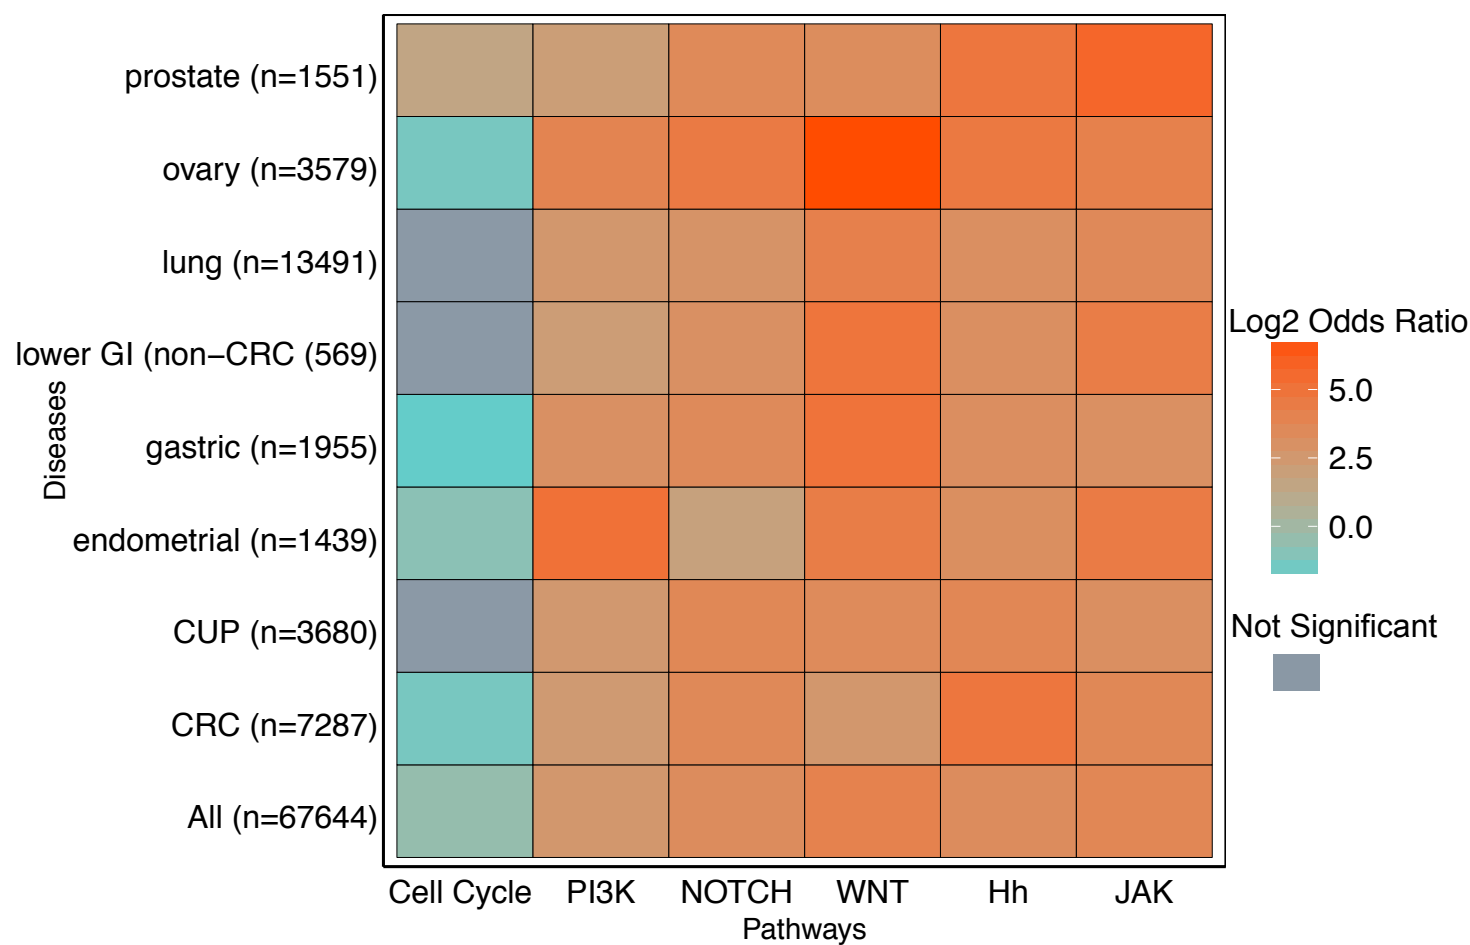

Supplement: mmc2.pdf [file mmc2.pdf]
